# Supplementary material for: Formation of moth-eye-like structures on silicon through in situ crystallization of layered Mg silicate
Source: Royal Society of Chemistry journal article supplement (doi:10.1039/d3dt04105k), 2024-01-01
Supplement: d3dt04105k1.pdf [file d3dt04105k1.pdf]

## Electronic Supplementary Information (ESI)

### Formation of moth-eye-like structures on silicon through in situ crystallization of a layered Mg silicate

Yuki Nakauchi,<sup>a, §</sup> Hikari Minamisawa,<sup>b</sup> Tomohiko Okada<sup>a, c, §, \*</sup>

<sup>a</sup>Department of Materials Chemistry, and <sup>b</sup>Technical Unit, Faculty of Engineering, Shinshu University, 4-17-1  
Wakasato, Nagano, Nagano 380-8553, Japan

<sup>c</sup>Research Initiative for Supra-Materials, Shinshu University, 4-17-1 Wakasato, Nagano, Nagano 380-8553, Japan

\* Corresponding author: Tomohiko Okada, E-mail: [tomohiko@shinshu-u.ac.jp](mailto:tomohiko@shinshu-u.ac.jp),  
Tel: +81-26-269-5414, Fax: +81-26-269-5424

§Y. N. and T. O. contributed equally.

#### Contents

- SEM image and photograph of product obtained when the water volume was 20 mL (Fig. S1)
- XRD patterns of P-Si and ME-Si (Fig. S2)
- Photographs and visible diffuse reflectance spectra of ME-Si and its powder after grinding (Fig. S3)
- Experimental conditions: temperature, aging time, concentrations of Mg<sup>2+</sup> and Cl<sup>-</sup>, and molar ratio of starting mixtures (Table S1)
- Color parameters and chroma of products (Table S2)
- SEM image of ME-Si\_170°C, XRD patterns and visible diffuse reflectance spectra of the products obtained at 80°C, 100°C, 120°C, 150°C and 170°C (Fig. S4)
- XRD patterns of the products obtained at different aging times (3, 6, 9, 24, 48, and 72 h: Fig. S5), and different concentrations of MgCl<sub>2</sub> and LiF in the starting mixtures (Fig. S6)
- Adsorbed amount of MB on the products obtained at different MgCl<sub>2</sub> and LiF concentrations (Fig. S7)
- SEM images and *L*\* values of the products obtained at different MgCl<sub>2</sub> and LiF concentrations (Fig. S8)

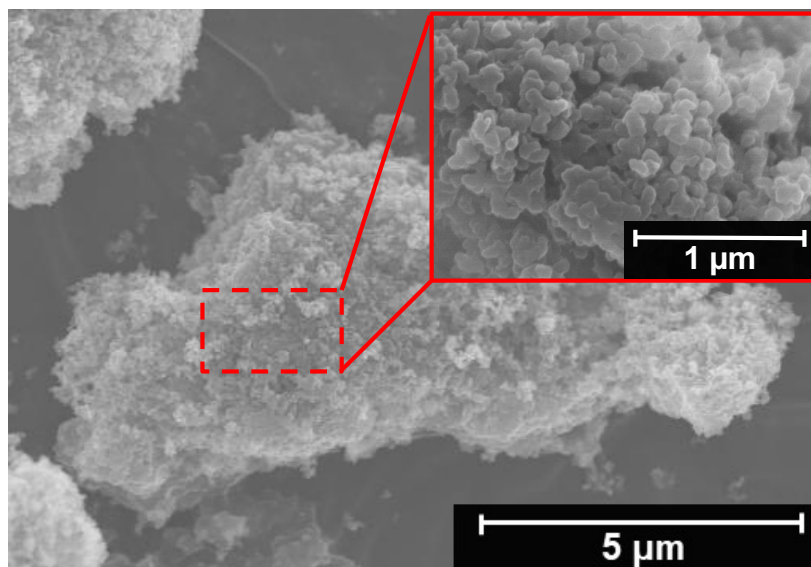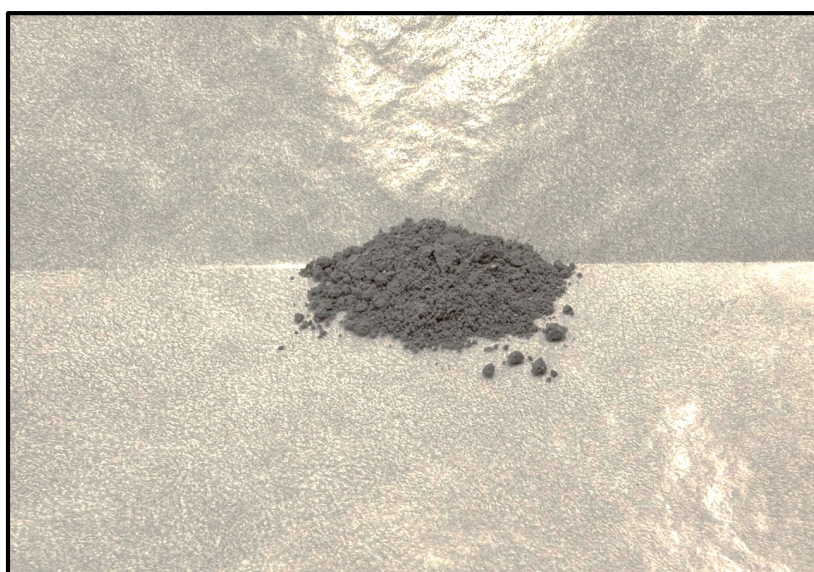

**Fig. S1.** SEM image and photograph of product obtained when water volume was 20 mL in the starting mixture.

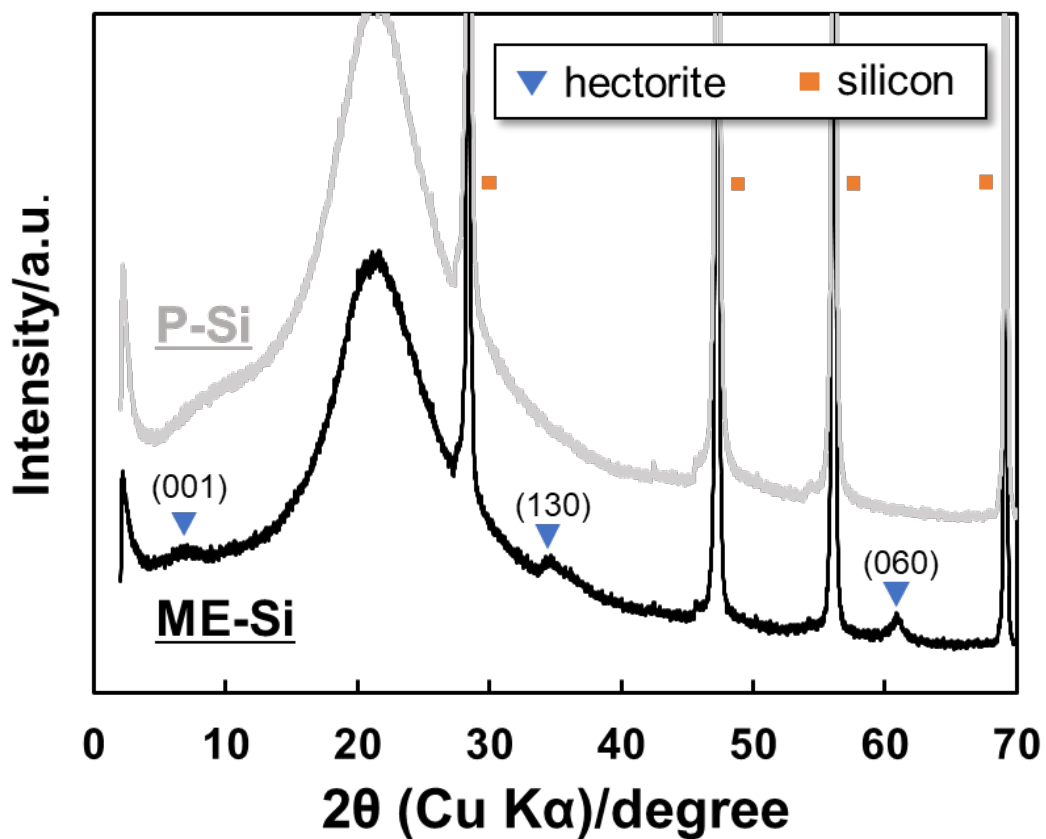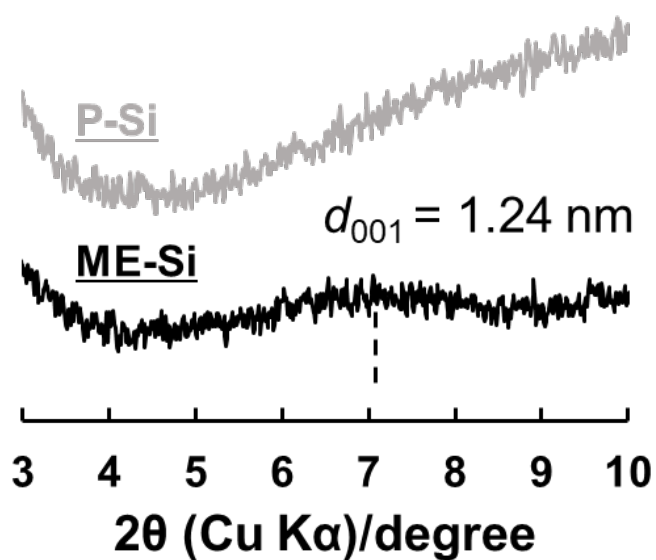

**Fig. S2.** XRD patterns of P-Si (gray line) and ME-Si (black line).

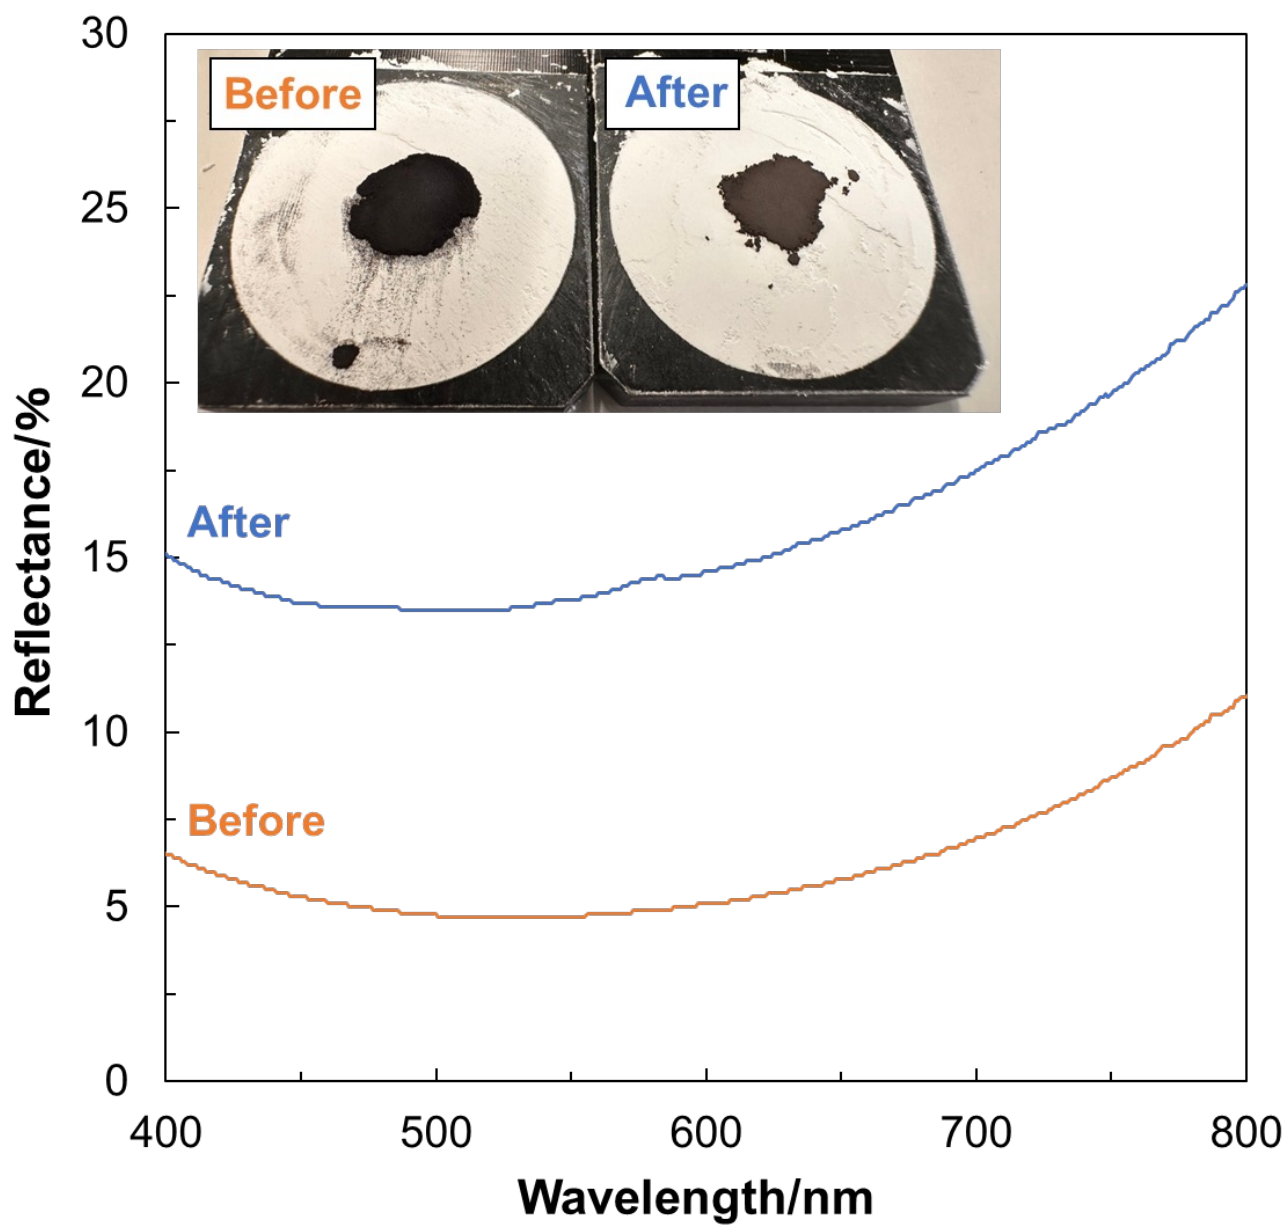

**Fig. S3.** Photographs and visible diffuse reflectance spectra of ME-Si and its powder after grinding.

**Table S1.** Experimental conditions for the *in-situ* crystallization of Mg silicate. Characterization results are shown in the corresponding figures, whose numbers are listed on the right side.

| Sample      | Temperature/°C | Time/h | Conc./M [Mg] | [Cl] | LiF:MgCl <sub>2</sub> :Si |                          |
|-------------|----------------|--------|--------------|------|---------------------------|--------------------------|
| ME-Si       | 150            | 48     | 0.12         | 0.24 | 0.07:0.27:8.0             | } Figs. 1-4,<br>Fig. S2, |
| ME-Si_80°C  | 80             | 48     | 0.12         | 0.24 | 0.07:0.27:8.0             |                          |
| ME-Si_100°C | 100            | 48     | 0.12         | 0.24 | 0.07:0.27:8.0             |                          |
| ME-Si_120°C | 120            | 48     | 0.12         | 0.24 | 0.07:0.27:8.0             |                          |
| ME-Si_170°C | 170            | 48     | 0.12         | 0.24 | 0.07:0.27:8.0             |                          |
| ME-Si_3 h   | 150            | 3      | 0.12         | 0.24 | 0.07:0.27:8.0             | } Fig. 6,<br>Fig. S5,    |
| ME-Si_6 h   | 150            | 6      | 0.12         | 0.24 | 0.07:0.27:8.0             |                          |
| ME-Si_9 h   | 150            | 9      | 0.12         | 0.24 | 0.07:0.27:8.0             |                          |
| ME-Si_24 h  | 150            | 24     | 0.12         | 0.24 | 0.07:0.27:8.0             |                          |
| ME-Si_72 h  | 150            | 72     | 0.12         | 0.24 | 0.07:0.27:8.0             |                          |
| ME-Si_3     | 150            | 48     | 0.36         | 0.72 | 0.21:0.8:8.0              | } Figs.<br>S6-S8         |
| ME-Si_6     | 150            | 48     | 0.72         | 1.4  | 0.42:1.6:8.0              |                          |
| ME-Si_9     | 150            | 48     | 1.1          | 2.2  | 0.63:2.4:8.0              |                          |
| ME-Si_12    | 150            | 48     | 1.4          | 2.9  | 0.84:3.2:8.0              |                          |
| ME-Si_15    | 150            | 48     | 1.8          | 3.6  | 1.1:4.1:8.0               |                          |
| ME-Si_20    | 150            | 48     | 2.4          | 4.8  | 1.4:5.3:8.0               |                          |

**Table S2.** Color parameters and chroma ( $(|a^*|^2+|b^*|^2)^{1/2}$ ) of products.

| <b>Sample</b> | <b><math>L^*</math></b> | <b><math>a^*</math></b> | <b><math>b^*</math></b> | <b><math>( a^* ^2+ b^* ^2)^{1/2}</math></b> |
|---------------|-------------------------|-------------------------|-------------------------|---------------------------------------------|
| <b>ME-Si</b>  | 27.5 ± 1.3              | 2.7                     | -1.1                    | 2.9                                         |
| P-Si          | 38.7                    | 0.8                     | -2.2                    | 2.3                                         |
| ME-Si_24 h    | 28.7                    | 2.8                     | -2.2                    | 3.6                                         |
| ME-Si_80°C    | 32.0                    | 2.6                     | 2.9                     | 3.9                                         |
| ME-Si_100°C   | 30.3                    | 3.5                     | -0.5                    | 3.5                                         |
| ME-Si_120°C   | 29.7                    | 2.9                     | 1.0                     | 3.1                                         |

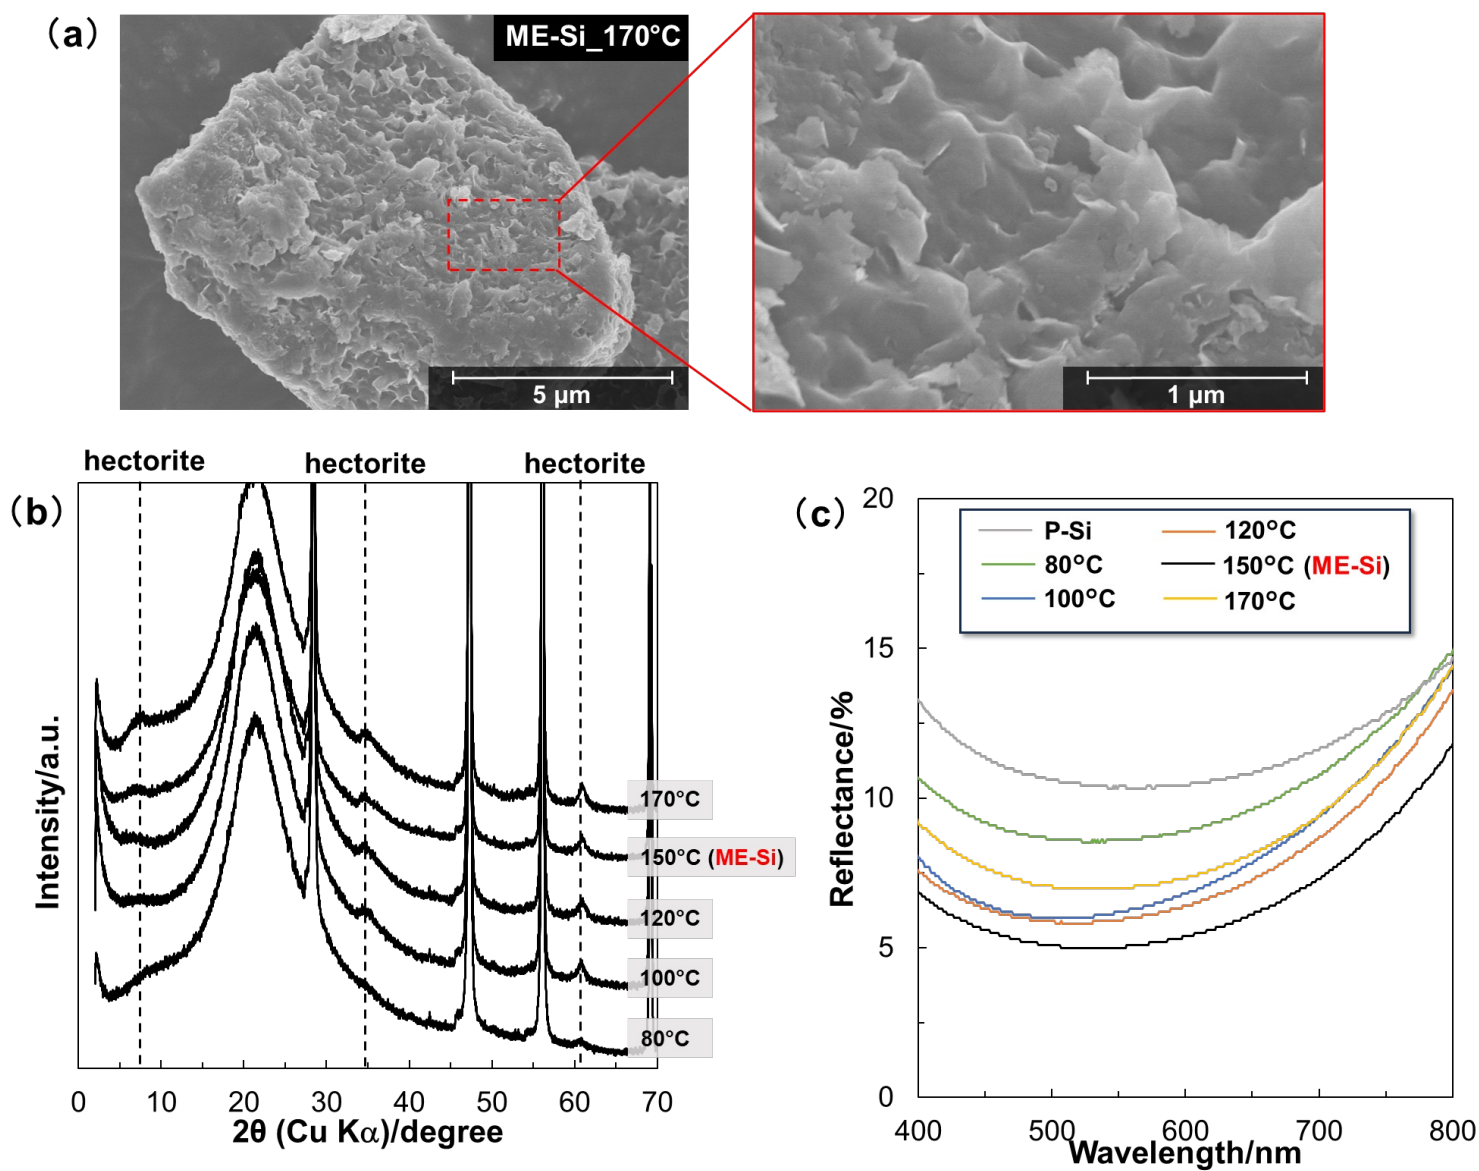

**Fig. S4.** SEM image of ME-Si\_170°C, XRD patterns and visible diffuse reflectance spectra of the products obtained at 80°C, 100°C, 120°C, 150°C and 170°C (Fig. S4)

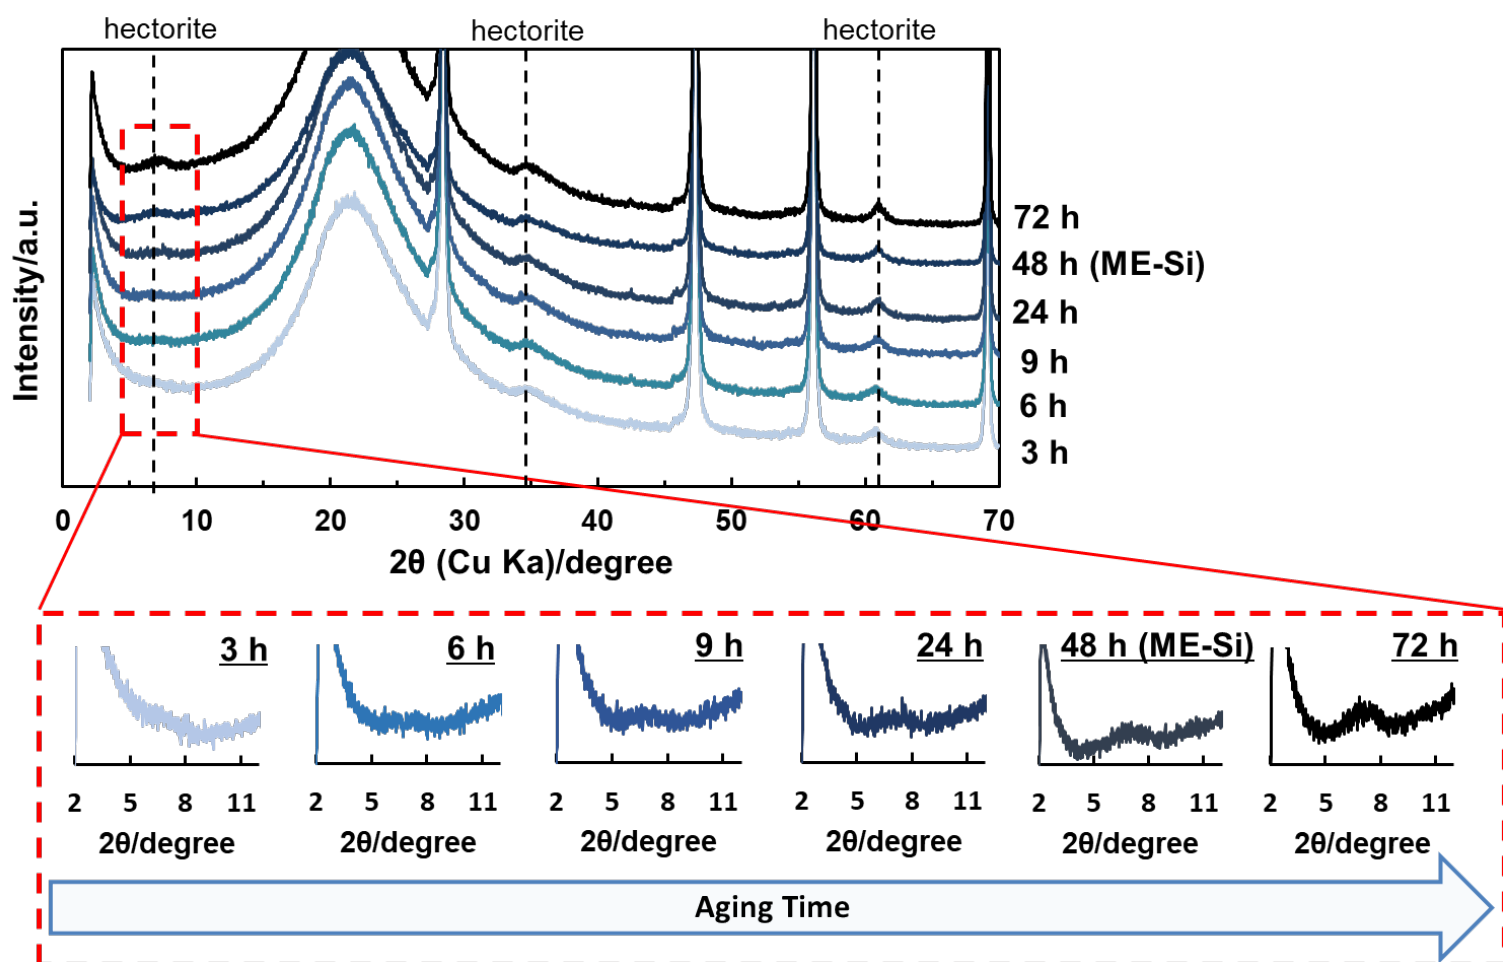

**Fig. S5.** XRD patterns of the product obtained via reactions at 3, 6, 9, 24, 48, and 72 h.



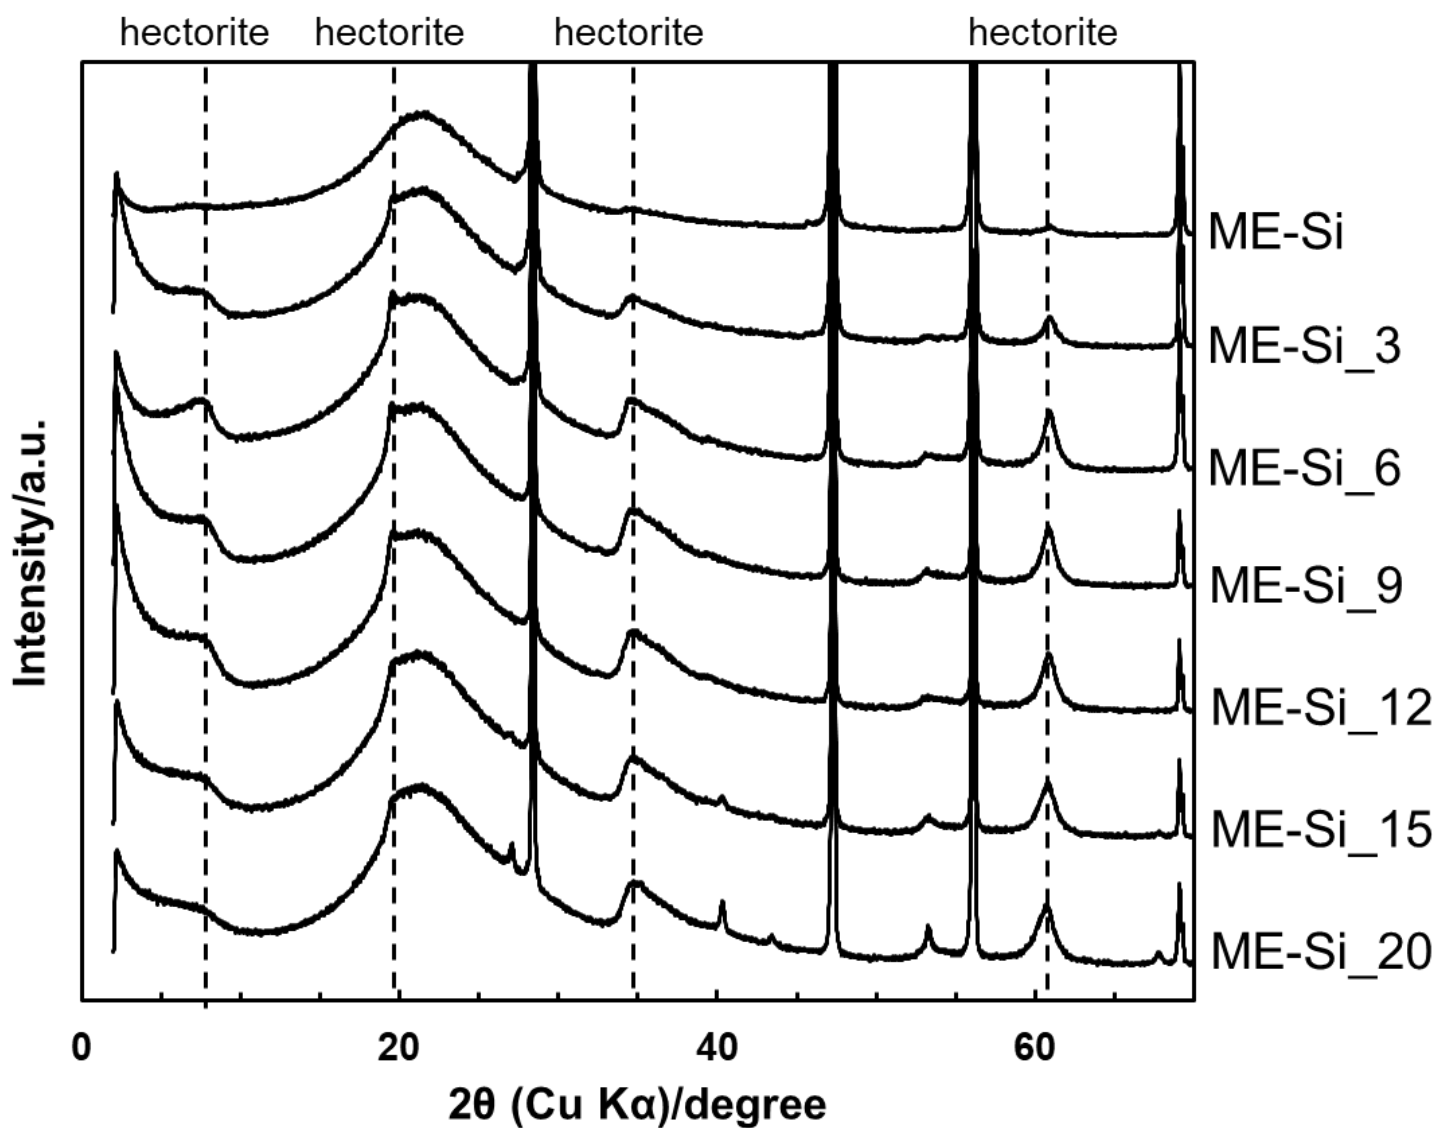

**Fig. S6.** XRD patterns of the products obtained with different amounts of  $\text{MgCl}_2$  and  $\text{LiF}$  in the starting mixtures. The  $x$  in the sample name (ME-Si <sub>$x$</sub> ) denotes  $x$ -folds the amounts of  $\text{MgCl}_2$  and  $\text{LiF}$  in the starting mixtures compared with those of ME-Si.

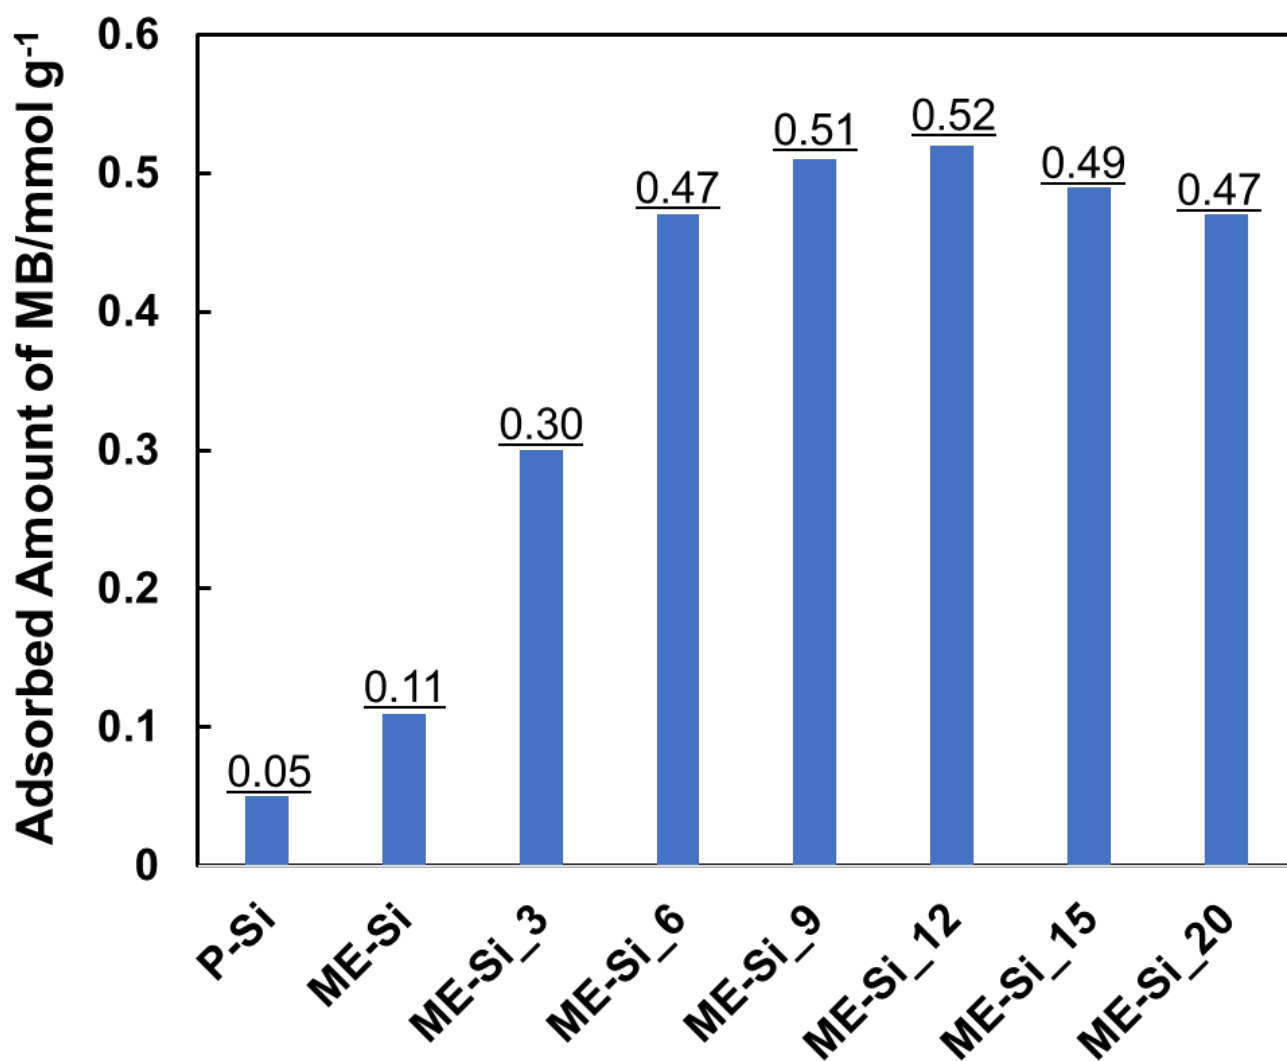

**Fig. S7.** Adsorbed amount of MB on products obtained from aqueous solutions at room temperature.

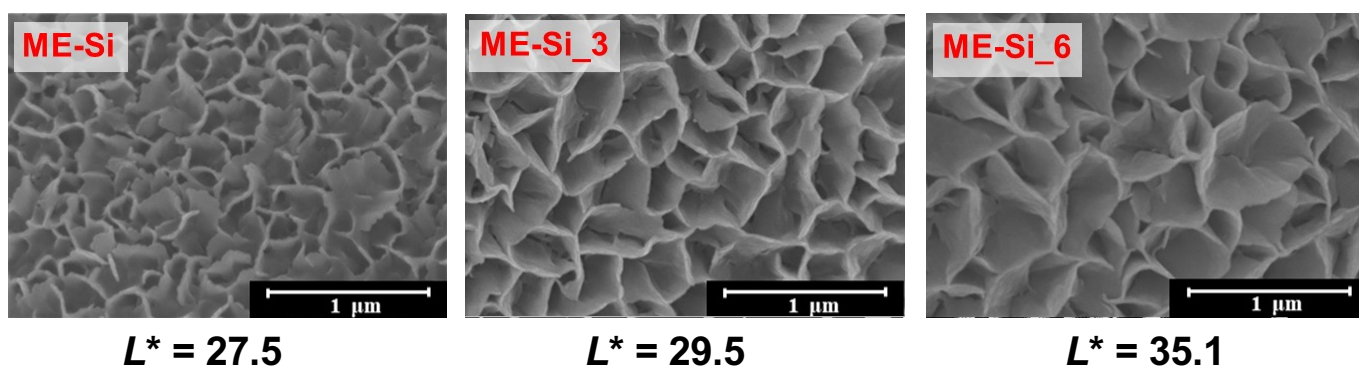

**Fig. S8.** SEM images of (left) ME-Si and (middle) 3-fold and (right) 6-fold higher concentrations of aqueous  $\text{MgCl}_2$  solutions than that of ME-Si.  $L^*$  values of the products are shown at the bottom.
